# Supplementary material
Source: publisher site journal article supplement (https://www.spandidos-publications.com/7915/downloadSupplementary)
Supplement: Supplementary file 1 [file downloadSupplementary]

Table SI. Top 10 DEGs identified by RNA-sequencing analysis.

| Gene symbol | log <sub>2</sub> Fold change | P-value                 | adj. P-value (FDR)     | KEGG pathway enrichment             | GO biological process                          |
|-------------|------------------------------|-------------------------|------------------------|-------------------------------------|------------------------------------------------|
| BTG2        | 2.0324                       | 1.67x10 <sup>-84</sup>  | 5.03x10 <sup>-80</sup> | p53 signaling (hsa04115)            | Regulation of cell cycle (GO: 0051726)         |
| CDKN1A      | 2.2949                       | 2.43x10 <sup>-80</sup>  | 3.65x10 <sup>-76</sup> | Cell cycle (hsa04110)               | Cell cycle arrest (GO: 0007050)                |
| FDXR        | 1.5857                       | 7.17x10 <sup>-62</sup>  | 7.18x10 <sup>-58</sup> | Metabolic pathways (hsa01100)       | Electron transport (GO: 0006118)               |
| COL17A1     | 1.7197                       | 2.64x10 <sup>-59</sup>  | 1.98x10 <sup>-55</sup> | ECM-receptor interaction (hsa04512) | Collagen fibril organization (GO: 0030199)     |
| PTPRU       | 1.4035                       | 1.90x10 <sup>-57</sup>  | 1.14x10 <sup>-53</sup> | Cell adhesion (hsa04514)            | Protein dephosphorylation (GO: 0006470)        |
| TAGLN       | -1.8891                      | 2.11 x10 <sup>-48</sup> | 7.91x10 <sup>-45</sup> | Vascular smooth muscle (hsa05410)   | Actin cytoskeleton (GO: 0015629)               |
| CDKN1C      | -2.1359                      | 1.06 x10 <sup>-45</sup> | 2.66x10 <sup>-42</sup> | Cell cycle (hsa04110)               | Response to organic substance (GO: 0010033)    |
| NEK2        | -1.3301                      | 1.10 x10 <sup>-36</sup> | 1.44x10 <sup>-33</sup> | Cell cycle (hsa04110)               | Anatomical structure development (GO: 0048856) |
| HMGB1P5     | -1.4506                      | 2.04 x10 <sup>-35</sup> | 2.37x10 <sup>-32</sup> | Pseudogene                          | Pseudogene                                     |
| ASPM        | -1.4724                      | 1.09 x10 <sup>-34</sup> | 1.21x10 <sup>-31</sup> | Focal adhesion (hsa04510)           | Cell migration (GO: 0016477)                   |
| NOX1        | 1.5804                       | 0.00001939              | 0.0021                 | ROS pathway (hsa04152)              | NADPH oxidase activity (GO: 0004497)           |

The top 10 DEGs, comprising both upregulated and downregulated genes, were selected based on p-values. The list also includes a gene of interest (NOX1). Adjusted P-values (FDR) were calculated using the Benjamini-Hochberg method. KEGG pathway and GO biological process annotations were sourced from their respective databases. DEGs, differentially expressed genes; FDR, false discovery rate; KEGG, Kyoto Encyclopedia of Genes and Genomes; GO, Gene Ontology.
